# Supplementary material for: Extended 5-Year Follow-up Results of a Phase Ib Study (BRIM7) of Vemurafenib and Cobimetinib in BRAF -Mutant Melanoma
Source: Oxford University Press journal article supplement (doi:10.1158/1078-0432.ccr-18-4180), 2019-11-15
Supplement: 10780432ccr184180-sup-214185_4_supp_5785357_py1l32.docx [file 10780432ccr184180-sup-214185_4_supp_5785357_py1l32.docx]

**Supplementary Figure 1.** Flow chart of patient disposition. Abbreviations: BID, twice daily; PD, progressive disease; QD, once daily.

Dose escalation

3 + 3 design, 10 cohorts

n = 63

Cohort expansion

Cobimetinib 60 mg QD +

Vemurafenib 720 mg BID

n = 27

Cohort expansion

Cobimetinib 60 mg QD +

Vemurafenib 960 mg BID

n = 39

All treated patients (safety population)

n = 129

Follow-up: Vemurafenib
monotherapy–PD

n = 66

Follow-up: BRAF inhibitor–naive

n = 63

Discontinued study

n = 65

Reason, n (%)

- PD, 56 (86.2)
- Adverse event, 2 (3.1)
- Death, 1 (1.5)
- Withdrew consent, 2 (3.2)
- Physician decision, 3 (4.6)
- Other, 1 (1.5)

Discontinued study

n = 58

Reason, n (%)

- PD, 39 (62.9)
- Adverse event, 8 (12.9)
- Death, 0
- Physician decision, 1 (1.6)
- Withdrawal by patient, 0
- Other, 7 (11.3)
- Lost to follow-up, 1 (1.6)
